# Supplementary material for: High-Performance Polyamide Reverse Osmosis Membrane Containing Flexible Aliphatic Ring for Water Purification
Source: MDPI journal article supplement (doi:10.3390/polym15040944), 2023-02-14
Supplement: s1 [file s1]

# Supplementary Material

## High-performance polyamide reverse osmosis membrane containing flexible aliphatic ring for water purification

Chi Jiang\*, Zhaohui Fei and Yingfei Hou\*

State Key Laboratory of Heavy Oil Processing, College of Chemistry and Chemical Engineering, China University of Petroleum (East China), Qingdao 266580, China

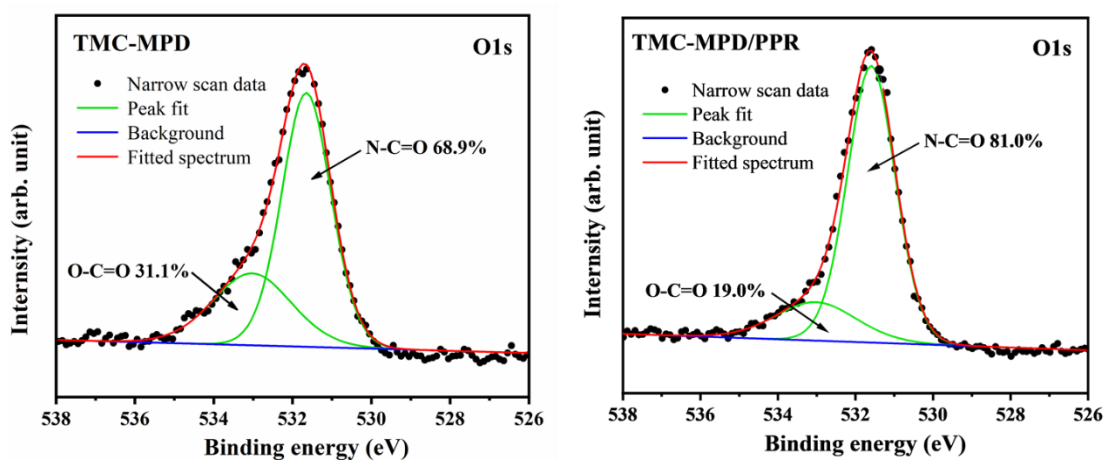

**Figure S1** O1s XPS spectra of the pristine membrane (TMC-MPD) and the membrane fabricated by adding 1.0% PPR (TMC-MPD/PPR)

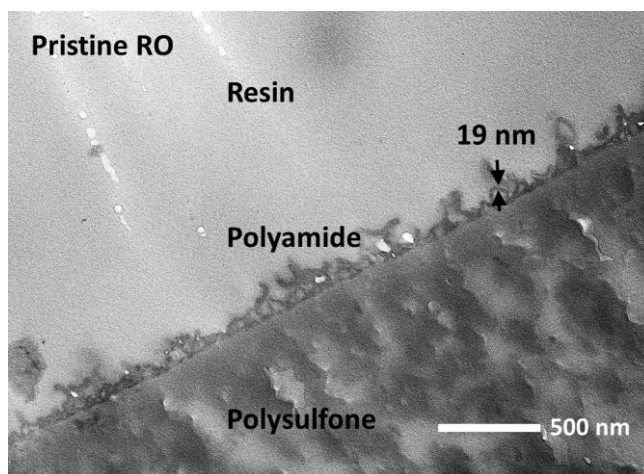

**Figure s2** Cross-sectional TEM image of the pristine RO membrane

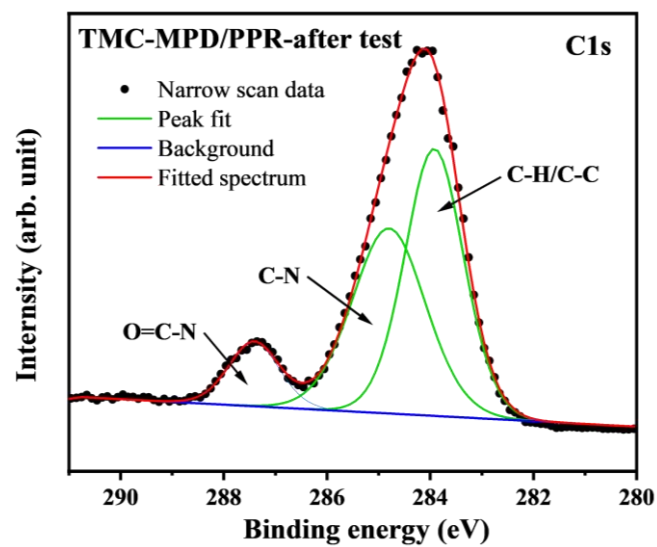

**Figure S3** C1s XPS spectra of the TMC-MPD/PPR membrane after test

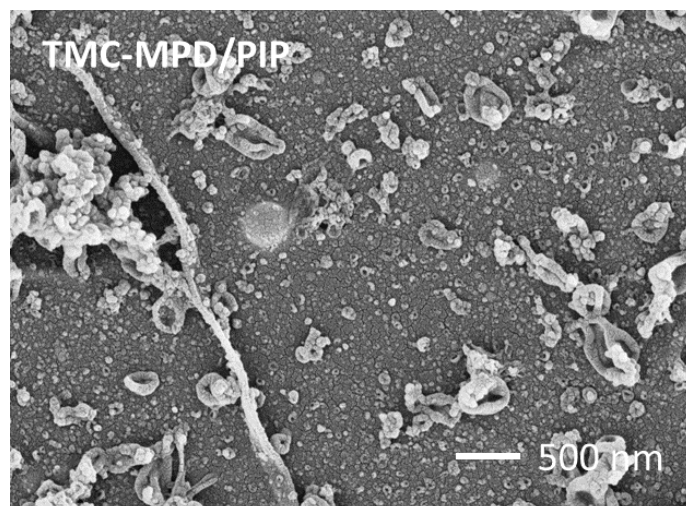

**Figure S4** Surface SEM image of membrane fabricated by adding 10% PIP.
